# Supplementary material for: Cyclopalladated complexes derived from benzamidoxime
Source: Royal Society of Chemistry journal article supplement (doi:10.1039/c3dt51867a), 2013-09-26
Supplement: c3dt51867a.pdf [file c3dt51867a.pdf]

## Electronic Supplementary Information (ESI)

### Experimental

|                                              |     |
|----------------------------------------------|-----|
| General                                      | S2  |
| Synthesis of complex <b>1</b>                | S2  |
| Synthesis of complexes <b>2</b>              | S3  |
| Synthesis of complexes <b>3</b>              | S4  |
| Synthesis of complex <b>4</b>                | S6  |
| Synthesis of complexes <b>5</b> and <b>6</b> | S7  |
| Synthesis of complex <b>7</b>                | S8  |
| Synthesis of complex <b>8</b>                | S9  |
| X-ray crystal structure determination        | S10 |

## Experimental Section

*General.* When not stated, the reactions were carried out without precautions to exclude light or atmospheric oxygen or moisture. Melting points were determined on a Reichert apparatus and are uncorrected. Elemental analyses were carried out with a Carlo Erba 1106 microanalyzer. IR spectra were recorded on a Perkin-Elmer Spectrum 100 spectrophotometer using Nujol mulls between polyethylene sheets. NMR spectra were recorded in Bruker Avance, 200, 300 or 400 MHz, NMR spectrometers. The NMR assignments were performed, in some cases, with the help of APT, HMQC and HMBC experiments. Chart 1 shows the atom numbering used in the NMR assignments.  $[\text{ClCH}_2\text{pyH-2}]\text{Cl}$  (Lancaster),  $\text{ClCH}_2\text{SMe}$ ,  $\text{C}_5\text{H}_4\text{NMe-4}$  (pic),  $\text{PTol}_3$ , xylylisocyanide ( $\text{XyNC}$ ),  $\text{AgTfO}$ ,  $\text{HTfO}$  (Fluka), 4,4'-di-tertbutyl-2,2'-bipyridine (tbbpy),  $\text{K}^t\text{BuO}$ ,  $\text{AgClO}_4$ ,  $\text{AgAcO}$  (Aldrich),  $\text{NaAcO}$  (Sigma), MeCN (Carlo Erba), dimethylacetylenedicarboxylate (DMAD (Alfa Aesar) were obtained from commercial sources. The oxime  $\text{C}_6\text{H}_5\text{C}(\text{NH}_2)=\text{NOH}$  (**A**) was prepared as described in the literature.<sup>5</sup> The complex  $[\text{Pd}\{\text{C},\text{N}-\text{C}_6\text{H}_4\{\text{C}(\text{NH}_2)=\text{NOH}\}-2\}(\mu\text{-Cl})_2]$  (**1**) was previously reported but we include here its IR and NMR spectral data which were poorly described. The solvents were distilled before use.

**Synthesis of  $[\text{Pd}\{\text{C},\text{N}-\text{C}_6\text{H}_4\{\text{C}(\text{NH}_2)=\text{NOH}\}-2\}(\mu\text{-Cl})_2]$  (**1**).** A suspension containing  $\text{PdCl}_2$  (360 mg, 2.03 mmol) and  $\text{LiCl}$  (175 mg, 4.12 mmol) in MeOH (6 mL) was refluxed for 40 min and then allowed to cool at room temperature. To the resulting red solution was added another containing benzamidoxime (276 mg, 2.03 mmol) and  $\text{NaAcO}$  (167 mg, 2.03 mmol) in MeOH (5 mL), the reaction mixture was refluxed for 5 h, allowed to cool and filtered through a short pad of Celite. The solution was concentrated to 2 mL and  $\text{H}_2\text{O}$  (20 mL) was added. The suspension was filtered and the cream colored solid collected was extracted with a  $\text{Et}_2\text{O}/\text{CH}_2\text{Cl}_2$  mixture (20/5 mL, 3 x 25 mL). The combined extracts were filtered through Celite, the solution was concentrated to 5 mL and n-pentane (20 mL) was added. The

suspension was filtered and the solid collected was washed with n-pentane (2 x 5 mL) and dried, first by suction and then in an oven at 70 °C for 45 min to give **1** as a yellowish-cream solid (278 mg, 1.00 mmol, 49%). Mp: 209 °C (decomp). <sup>1</sup>H NMR (d<sub>6</sub>-acetone, 400 MHz, 25 °C) δ 6.89 (br, 2 H, NH<sub>2</sub>), 6.98 (td, 1 H, H<sup>5</sup>, <sup>3</sup>J<sub>HH</sub> = 8 Hz, <sup>4</sup>J<sub>HH</sub> = 2 Hz), 7.06 (td, 1 H, H<sup>4</sup>, <sup>3</sup>J<sub>HH</sub> = 8 Hz, <sup>4</sup>J<sub>HH</sub> = 1 Hz), 7.30 (d, broad, 1 H, H<sup>6</sup>, <sup>3</sup>J<sub>HH</sub> = 8 Hz), 7.38 (dd, 1 H, H<sup>3</sup>, <sup>3</sup>J<sub>HH</sub> = 8 Hz, <sup>4</sup>J<sub>HH</sub> = 2 Hz), 8.31 (br, 1 H, OH). <sup>13</sup>C{<sup>1</sup>H} NMR (d<sub>6</sub>-acetone, 100 MHz, 25 °C) δ 124.2 (CH<sup>3</sup>), 125.2 (C<sup>4</sup>), 129.2 (C<sup>5</sup>), 133.7 (C<sup>6</sup>), 137.4 (C<sup>2</sup>), 148.6 (C<sup>1</sup>), 164.2 (C<sup>7</sup>). IR (cm<sup>-1</sup>): ν(NH) + ν(OH), 3469 br, 3382 br; ν(C=N), 1668. Various bands in the 250-350 cm<sup>-1</sup> region impeded the unequivocal assignment of the ν(PdCl) bands. Anal. Found: C, 30.40; H, 2.67; N, 10.40 Calcd for C<sub>14</sub>H<sub>14</sub>Cl<sub>2</sub>N<sub>4</sub>O<sub>2</sub>Pd<sub>2</sub>: C, 30.35; H, 2.55; N, 10.11.

**Synthesis of SP-4-4-[Pd{C,N-C<sub>6</sub>H<sub>4</sub>{C(NH<sub>2</sub>)=NOH}-2}Cl(L)] (L = PTol<sub>3</sub>, Tol = C<sub>6</sub>H<sub>4</sub>Me-4 (**2a**); CNX<sub>y</sub>, X<sub>y</sub> = C<sub>6</sub>H<sub>3</sub>Me<sub>2</sub>-2,6 (**2b**), pic = C<sub>5</sub>H<sub>4</sub>NMe-4 (**2c**)).** To a suspension of **1** (for **2a**, 62 mg, 0.22 mmol; for **2b**, 103 mg, 0.37 mmol; for **2c**, 65 mg, 0.24 mmol) in CH<sub>2</sub>Cl<sub>2</sub> (5 mL) was added the equimolar amount of the appropriate ligand [for **2a**, solid PTol<sub>3</sub>, 68 mg, 0.22 mmol; for **2b**, a solution of CNX<sub>y</sub>, 49 mg, 0.37 mmol, in CH<sub>2</sub>Cl<sub>2</sub>(5 mL), added dropwise; for **2c**, pic, 23 μL, 0.24 mmol). The resulting solution was stirred for 30 min, filtered through a short pad of Celite, and concentrated almost to dryness. The residue was stirred with Et<sub>2</sub>O (for **2a**, 20; for **2b**, 10 mL) or an Et<sub>2</sub>O/n-pentane mixture (**2c**, 1:10, 11 mL) until a white or greenish (**2c**) suspension formed which was filtered. The solid collected was washed with Et<sub>2</sub>O (2 mL) and dried by suction to give the title compound as a white solid (for **2a**, 109 mg, 0.19 mmol, 84%; for **2b**, 129 mg, 0.32 mmol, 92%). **2c** was recrystallized from CH<sub>2</sub>Cl<sub>2</sub> and n-pentane and dried in an oven at 70 °C for 1 h to give a greenish-white powder (68 mg, 0.18 mmol, 78%). Crystals of **2a** suitable for an X-ray diffraction study grew from CDCl<sub>3</sub> and Et<sub>2</sub>O by the liquid diffusion method.

**2a:** Mp: 238 °C (decomp). <sup>1</sup>H NMR (CDCl<sub>3</sub>, 400 MHz, 25 °C) δ 2.36 (s, 9 H, Me,

Tol), 5.17 (s, br, 2 H, NH<sub>2</sub>), 6.42 (ddd, 1 H, H<sup>6</sup>, <sup>3</sup>J<sub>HH</sub> = 6 Hz, <sup>4</sup>J<sub>HH</sub> = 5.6 Hz, <sup>5</sup>J<sub>HH</sub> <sup>4</sup>J<sub>HP</sub> = 1 Hz), 6.55 (td, 1 H, H<sup>5</sup>, <sup>3</sup>J<sub>HH</sub> = 8 Hz, <sup>4</sup>J<sub>HH</sub> = 2 Hz), 6.93 (t, 1 H, H<sup>4</sup>, <sup>3</sup>J<sub>HH</sub> = 8 Hz), 6.96 (td, 1 H, H<sup>3</sup>, <sup>3</sup>J<sub>HH</sub> = 8 Hz, <sup>4</sup>J<sub>HH</sub> = 2 Hz), 7.16 ("dd", *meta*-H, Tol, <sup>3</sup>J<sub>HH</sub> = 8 Hz, <sup>4</sup>J<sub>HP</sub> = 2 Hz), 7.58 ("dd", *ortho*-H, Tol, <sup>3</sup>J<sub>HP</sub> = 12 Hz, <sup>3</sup>J<sub>HH</sub> = 8 Hz), 9.31 (d, 1 H, OH, <sup>4</sup>J<sub>HP</sub> = 3 Hz). <sup>13</sup>C{<sup>1</sup>H} NMR (75 MHz, CDCl<sub>3</sub>, 25 °C) δ 21.5 (Me, Tol), 122.1 (C<sup>3</sup>), 123.8 (C<sup>4</sup>), 127.6 (d, *ipso*-C, Tol, <sup>1</sup>J<sub>CP</sub> = 53 Hz), 128.8 (C<sup>5</sup>), 128.9 (d, *meta*-C, Tol, <sup>3</sup>J<sub>CP</sub> = 11 Hz), 135.1 (d, *ortho*-C, Tol, <sup>2</sup>J<sub>CP</sub> = 13 Hz), 138.1 (d, C<sup>6</sup>, <sup>3</sup>J<sub>CP</sub> = 11 Hz), 138.3 (d, C<sup>2</sup>, <sup>3</sup>J<sub>CP</sub> = 1 Hz), 141.0 (d, *para*-C, Tol, <sup>4</sup>J<sub>CP</sub> = 2 Hz), 150.5 (C<sup>1</sup>), 157.7 (C<sup>7</sup>). <sup>31</sup>P{<sup>1</sup>H} NMR (121 MHz, CDCl<sub>3</sub>, 25 °C) δ 40.2. IR (cm<sup>-1</sup>): ν(NH) + ν(OH), 3479, 3315, 3260; ν(C=N), 1675; ν(PdCl), 298. Anal. Found: C, 57.65; H, 5.19; N, 5.16 Calcd for C<sub>28</sub>H<sub>28</sub>ClN<sub>2</sub>OPPd: C, 57.85; H, 4.85; N, 4.82.

**2b**: Mp: 105 °C. <sup>1</sup>H NMR (CDCl<sub>3</sub>, 400 MHz, 25 °C) δ 2.53 (s, 6 H, Me, Xy), 5.30 (s, br, 2 H, NH<sub>2</sub>), 7.07 (t, 1 H, H<sup>5</sup>, <sup>3</sup>J<sub>HH</sub> = 7 Hz), 7.08 (d, 1 H, H<sup>3</sup>, <sup>3</sup>J<sub>HH</sub> = 7 Hz), 7.13 (d, 1 H, H<sup>4</sup>, <sup>3</sup>J<sub>HH</sub> = 7 Hz), 7.17 (d, 2 H, *meta*-Xy, <sup>3</sup>J<sub>HH</sub> = 8 Hz), 7.29 (t, 1 H, *para*-Xy, <sup>3</sup>J<sub>HH</sub> = 8 Hz), 7.34 (d, 1 H, H<sup>6</sup>, <sup>3</sup>J<sub>HH</sub> = 8 Hz), 8.66 (s, 1 H, OH). <sup>13</sup>C{<sup>1</sup>H} NMR (75 MHz, CDCl<sub>3</sub>, 25 °C) δ 18.9 (Me, Xy), 123.0 (C<sup>3</sup>), 124.8 (C<sup>4</sup>), 126.1 (br, *ipso*-Xy), 12.2 (*meta*-Xy), 130.0 (*para*-Xy), 130.3 (C<sup>5</sup>), 135.8 (*ortho*-Xy), 137.0 (C<sup>6</sup>), 150.2 (C<sup>1</sup>), 158.7 (C<sup>7</sup>), C<sup>2</sup> not observed. IR (cm<sup>-1</sup>): ν(NH) + ν(OH), 3468, 3352; ν(C≡N), 2188; ν(C=N), 1676; ν(PdCl), 286. Anal. Found: C, 47.00; H, 3.95; N, 10.05. Calcd for C<sub>16</sub>H<sub>16</sub>ClN<sub>3</sub>OPd: C, 47.08; H, 3.95; N, 10.29.

**2c**: Mp: 134 °C. <sup>1</sup>H NMR (CDCl<sub>3</sub>, 400 MHz, 25 °C) δ 2.46 (s, 3 H, Me, pic), 5.20 (s, br, 2 H, NH<sub>2</sub>), 6.29 (d, 1 H, H<sup>6</sup>, <sup>3</sup>J<sub>HH</sub> = 8 Hz), 6.94 (t, 1 H, H<sup>5</sup>, <sup>3</sup>J<sub>HH</sub> = 8 Hz), 7.00 (d, 1 H, H<sup>3</sup>, <sup>3</sup>J<sub>HH</sub> = 7 Hz), 7.04 (t, 1 H, H<sup>4</sup>, <sup>3</sup>J<sub>HH</sub> = 7 Hz), 7.25 (d, 2 H, *meta*-H, pic, <sup>3</sup>J<sub>HH</sub> = 6 Hz), 8.59 (s, 1 H, OH), 8.69 (d, 2 H, *ortho*-H, pic, <sup>3</sup>J<sub>HH</sub> = 6 Hz). <sup>13</sup>C{<sup>1</sup>H} NMR (75 MHz, CDCl<sub>3</sub>, 25 °C) δ 21.3 (Me, pic), 122.2 (C<sup>3</sup>), 124.3 (C<sup>4</sup>), 126.4 (*meta*-pic, 129.2(C<sup>5</sup>), 131.4 (C<sup>6</sup>), 137.4 (C<sup>2</sup>), 149.9 (*para*-pic), 150.4 (C<sup>1</sup>), 152.4 (*ortho*-pic), 157.7 (C<sup>7</sup>). IR (cm<sup>-1</sup>): ν(NH) + ν(OH), 3462, 3304; ν(C=N), 1660; ν(PdCl), 297. Anal. Found: C, 41.84; H, 3.72; N, 11.01 Calcd for

C<sub>13</sub>H<sub>14</sub>ClN<sub>3</sub>OPd: C, 42.19; H, 3.81; N, 11.35.

**Synthesis of [Pd{C,N-C<sub>6</sub>H<sub>4</sub>{C(NH<sub>2</sub>)=NOH}-2}(L<sub>2</sub>)]ClO<sub>4</sub> (L = NC<sub>5</sub>H<sub>4</sub>Me-4, pic (3a); L<sub>2</sub> = 4,4'-di-*tert*-buthyl-bipyridine, tbbpy (3b)).** To a suspension of **1** (for **3a**, 106 mg, 0.38 mmol; for **3b**, 137 mg, 0.49 mmol) in CH<sub>2</sub>Cl<sub>2</sub> (15 mL) was added the appropriate ligand (for **3a**, pic, 80 μL, 0.76 mmol; for **3b**, tbbpy, 133 mg, 0.49 mmol) and excess NaClO<sub>4</sub>·H<sub>2</sub>O (100 mg, 0.71 mmol). The reaction mixture was stirred for 30 min, concentrated under vacuum to dryness, the residue was stirred with CH<sub>2</sub>Cl<sub>2</sub> (20 mL) and the suspension was filtered. The filtrate was concentrated under vacuum to 1 mL and Et<sub>2</sub>O (20 mL) was added. The suspension was filtered, the solid collected was washed with Et<sub>2</sub>O (2 x 3 mL) and dried by suction to give **3b** as a yellow solid (270 mg, 0.44 mmol, 90%) or an off white solid which was recrystallized from CH<sub>2</sub>Cl<sub>2</sub> and Et<sub>2</sub>O and dried in an oven at 75 °C for 30 min to give **3a** as greenish-white solid (144 mg, 0.27 mmol, 72%).

**3a:** Mp: 173 °C (decomp). <sup>1</sup>H NMR (d<sub>6</sub>-acetone, 400 MHz, 25 °C) δ 2.39 (s, 3 H, Me, pic), 2.47 (s, 2H, Me, pic), 6.12 (d, 1 H, H<sup>6</sup>), 6.95 (td, 1 H, H<sup>5</sup>, <sup>3</sup>J<sub>HH</sub> = 8 Hz, <sup>4</sup>J<sub>HH</sub> = 1 Hz), 7.11 (td, 1 H, H<sup>4</sup>, <sup>3</sup>J<sub>HH</sub> = 8 Hz, <sup>4</sup>J<sub>HH</sub> = 1 Hz), 7.21 (s, br, 2 H, NH<sub>2</sub>), 7.39 (d, 2 H, *meta*-pic, <sup>3</sup>J<sub>HH</sub> = 6 Hz), 7.53 (d, 2 H, *meta*-pic, <sup>3</sup>J<sub>HH</sub> = 6 Hz), 7.58 (dd, 1 H, H<sup>3</sup>, <sup>3</sup>J<sub>HH</sub> = 8 Hz, <sup>4</sup>J<sub>HH</sub> = 1 Hz), 8.53 (s, 1 H, OH), 8.65 (d, 2 H, *ortho*-pic, <sup>3</sup>J<sub>HH</sub> = 6 Hz), 8.88 (d, 2 H, *ortho*-pic, <sup>3</sup>J<sub>HH</sub> = 6 Hz). <sup>13</sup>C{<sup>1</sup>H} NMR (d<sub>6</sub>-acetone, 100 MHz, 25 °C) δ 21.0 (Me, pic), 21.1 (Me, pic), 124.5 (C<sup>3</sup>), 125.6 (C<sup>4</sup>), 127.1 (*meta*-pic), 128.3 (*meta*-pic), 130.3 (C<sup>5</sup>), 133.4 (C<sup>6</sup>), 138.0 (C<sup>2</sup>), 151.1 (*ortho*-pic), 151.9 (br, *para*-pic), 152.0 (C<sup>1</sup>), 152.6 (*ortho*-pic), 152.8 (*para*-pic), 170.0 (C<sup>7</sup>). Λ<sub>M</sub> (Ω<sup>-1</sup>cm<sup>2</sup>mol<sup>-1</sup>) = 138 (5.08 x 10<sup>-4</sup> M in acetone). IR (cm<sup>-1</sup>): ν(NH) + ν(OH), 3481, 3361; ν(C=N), 1647, ν(ClO) 1094, δ (OCIO) 624. Anal. Found: C, 43.14; H, 3.92; N, 10.29. Calcd for C<sub>19</sub>H<sub>21</sub>ClN<sub>4</sub>O<sub>5</sub>Pd: C, 43.28; H, 4.01; N, 10.63.

**3b:** Mp: 259 °C (decomp). H NMR (d<sub>6</sub>-acetone, 300 MHz, 25 °C) δ 1.42 (s, 9 H, Me, tbbpy), 1.46 (s, 9 H, tbbpy), 2.90 (s, br, 2 H, NH<sub>2</sub>), 7.09-7.14 (m, 2 H, Ar), 7.22 (s, br, 1 H),

7.35 (s, br, 1H), 7.48 (s, br, 1 H), 7.81 (m, 2 H, H<sup>5</sup>, tbbpy) 8.53 (s, 1H, H<sup>3</sup>, tbbpy), 8.54 (s, 1H, H<sup>3</sup>, tbbpy), 8.83 (d, 1 H, H<sup>6</sup>, tbbpy, <sup>3</sup>J<sub>HH</sub> = 5 Hz), 9.28 (d, 1 H, H<sup>6</sup>, tbbpy, <sup>3</sup>J<sub>HH</sub> = 4 Hz). <sup>13</sup>C{<sup>1</sup>H} NMR (d<sub>6</sub>-acetone, 75 MHz, 25 °C) δ 30.4 (Me, tbbpy), 36.3 (CMe<sub>3</sub>), 36.4 (CMe<sub>3</sub>), 120.8 (CH, tbbpy), 121.8 (CH), 124.4 (CH, tbbpy), 125.0 (CH), 150.9 (CH) 152.5 (CH, tbbpy), 154.8(C<sup>4</sup>, tbbpy), 157.3 (C<sup>ft</sup>), 165.5 (C<sup>2</sup>, tbbpy), 165.7 (C<sup>7</sup>), C<sup>1</sup> and C<sup>2</sup> not observed. Λ<sub>M</sub> (Ω<sup>-1</sup>cm<sup>2</sup>mol<sup>-1</sup>) = 131 (4.99 x 10<sup>-4</sup>M in acetone). IR (cm<sup>-1</sup>): ν(NH) + ν(OH), 3483, 3352; ν(C=N), 1642, ν(C=O) 1098, δ (OC=O) 624. Anal. Found: C, 49.11; H, 4.83; N, 9.14. Calcd for C<sub>25</sub>H<sub>31</sub>ClN<sub>4</sub>O<sub>5</sub>Pd: C, 49.27; H, 5.13; N, 9.19.

**Synthesis of PPN[Pd{C,N-C<sub>6</sub>H<sub>4</sub>{C(NH<sub>2</sub>)=NOH}-2}Cl<sub>2</sub>] (PPN = Ph<sub>3</sub>P=N=PPh<sub>3</sub> (4)).** To a suspension of **1** (55 mg, 0.20 mmol) in CH<sub>2</sub>Cl<sub>2</sub> (15 mL) was added the equimolar amount of [PPN]Cl (113 mg). An almost clear solution formed which was stirred for 2.5 h and filtered through a short pad of Celite. The filtrate was concentrated under vacuum to 1 mL and Et<sub>2</sub>O (20 mL) was added. A suspension formed which was filtered, the solid was washed with Et<sub>2</sub>O (2 x 3 mL) and dried, first by suction, and then in an oven at 75 °C for 2 h to give to give **4** as a pale tan solid (132 mg, 0.16 mmol, 78%). Mp: 240 °C (decomp). <sup>1</sup>H NMR (d<sub>6</sub>-acetone, 400 MHz, 25 °C) δ 6.02 (s, br, 2 H, NH<sub>2</sub>), 6.83 (ddd, 1 H, H<sup>5</sup>, <sup>3</sup>J<sub>HH</sub> = 7 Hz, <sup>4</sup>J<sub>HH</sub> = 2 Hz), 6.86 (ddd, 1H, H<sup>4</sup>, <sup>3</sup>J<sub>HH</sub> = 7 Hz, <sup>4</sup>J<sub>HH</sub> = 2 Hz), 7.14 (dd, 1 H, H<sup>3</sup>, <sup>3</sup>J<sub>HH</sub> = 7 Hz, <sup>4</sup>J<sub>HH</sub> = 2 Hz), 7.54-7.59 (m, 6 H, *para*-CH, PPN), 7.66-7.75 (m, 24 H, *ortho* + *meta*-CH, PPN), 7.80 (dd, 1 H, H<sup>6</sup>, <sup>3</sup>J<sub>HH</sub> = 7 Hz, <sup>4</sup>J<sub>HH</sub> = 2 Hz), 9.81 (s, 1 H, OH). (CD<sub>2</sub>Cl<sub>2</sub>, 400 MHz, 25 °C) δ 4.97 (s, br, 2 H, NH<sub>2</sub>), 6.85 (m, 1 H, Ar), 6.93-6.99 (m, 2H, Ar), 7.46-7.51 (m, 24 H, *ortho*- + *meta*-PPN), 7.65-7.69 (m, 6 H, *para*-PPN), 7.69-7.71 (m, 1 H, Ar), 9.44 (s, br, 1 H, OH). <sup>13</sup>C{<sup>1</sup>H} NMR (100 MHz, CD<sub>2</sub>Cl<sub>2</sub>, 25 °C) δ 121.4 (C<sup>3</sup>), 123.3 (C<sup>4</sup>), 127.4 (d, *ipso*-C, PPN, J<sub>CP</sub> = 108 Hz), 128.4 (C<sup>5</sup>), 129.8 (m, *ortho*- or *meta*-C, PPN), 132.5 (m, *ortho*- or *meta*-C, PPN), 134.1 (*para*-C, PPN), 135.0 (C<sup>6</sup>), 137.6 (C<sup>2</sup>), 148.9 (C<sup>1</sup>), 156.8 (C<sup>7</sup>), C<sup>2</sup>). <sup>31</sup>P{<sup>1</sup>H} NMR (121 MHz, d<sub>6</sub>-acetone, 25 °C) δ 21.3. Λ<sub>M</sub> (Ω<sup>-1</sup>cm<sup>2</sup>mol<sup>-1</sup>) = 108 (3.85 x 10<sup>-4</sup>M in

acetone). IR (cm<sup>-1</sup>):  $\nu(\text{NH}) + \nu(\text{OH})$ , 3461, 3315;  $\nu(\text{C}=\text{N})$ , 1672;  $\nu(\text{PdCl})$ , 268, 220. Anal. Found: C, 60.66; H, 4.40; N, 4.79. Calcd for C<sub>43</sub>H<sub>37</sub>Cl<sub>2</sub>N<sub>3</sub>OP<sub>2</sub>Pd: C, 60.69; H, 4.38; N, 4.94.

**Synthesis of [Pd{ $\mu$ -C,N,O-C<sub>6</sub>H<sub>4</sub>{C(NH<sub>2</sub>)=NO}-2}(PTol<sub>3</sub>)<sub>2</sub>] (5).** To a solution of complex **2a** (72 mg, 0.12 mmol) in degassed CH<sub>2</sub>Cl<sub>2</sub> (10 mL), kept under nitrogen atmosphere, was added K<sup>t</sup>BuO (16 mg, 0.14 mol). The resulting suspension was stirred for 4 h and then filtered in the air through a short pad of Celite. The solution was concentrated to 1 mL and n-hexane (20 q mL) was added and the solid washed with CH<sub>2</sub>Cl<sub>2</sub> (4 x 20 mL). The combined filtrates were concentrated under vacuum to 1 mL and n-hexane (20 mL) was added. The suspension was filtered, the solid collected was recrystallized from CH<sub>2</sub>Cl<sub>2</sub> (2 mL) and a 1:2 mixture of Et<sub>2</sub>O and n-hexane (15 mL) and dried, first by suction and then in an oven at 70 °C for 1 h to give **5** (61 mg, 0.11 mmol, 93%) as a yellow solid. Mp: 206 °C. <sup>1</sup>H NMR (CDCl<sub>3</sub>, 400 MHz, 25 °C)  $\delta$  2.34 (s, 9 H, Me, Tol), 3.95 (s, br, 2 H, NH<sub>2</sub>), 6.32 (td, 1 H, H<sup>5</sup>, <sup>3</sup>J<sub>HH</sub> = 8 Hz, <sup>4</sup>J<sub>HH</sub> = 2 Hz), 6.41 (dd, 1 H, H<sup>6</sup>, <sup>3</sup>J<sub>HH</sub> = 8 Hz, <sup>4</sup>J<sub>HH</sub> = 2 Hz), 6.71 (dd, 1 H, H<sup>4</sup>, <sup>3</sup>J<sub>HH</sub> = 8 Hz, <sup>4</sup>J<sub>HH</sub> = 1 Hz), 6.77 (t, 1 H, H<sup>3</sup>, <sup>3</sup>J<sub>HH</sub> = 8 Hz), 7.16 (d, *meta*-H, Tol, <sup>3</sup>J<sub>HH</sub> = 7 Hz), 7.58 ("dd", *ortho*-H, Tol, <sup>3</sup>J<sub>HP</sub> = 11 Hz, <sup>3</sup>J<sub>HH</sub> = 8 Hz). <sup>13</sup>C{<sup>1</sup>H} NMR (100 MHz, CDCl<sub>3</sub>, 25 °C)  $\delta$  21.4 (Me, Tol), 120.6 (C<sup>3</sup>), 122.8 (C<sup>4</sup>), 125.4 (C<sup>5</sup>), 128.2 (d, *ipso*-C, Tol, <sup>1</sup>J<sub>CP</sub> = 47 Hz), 129.1 (d, *meta*-C, Tol, <sup>3</sup>J<sub>CP</sub> = 10 Hz), 135.0 (d, *ortho*-C, Tol, <sup>2</sup>J<sub>CP</sub> = 13 Hz), 138.1 (d, C<sup>6</sup>, <sup>3</sup>J<sub>CP</sub> = 11 Hz), 140.3 (C<sup>2</sup>), 141.4 (*para*-C, Tol), 153.2 (d, C<sup>1</sup>, <sup>2</sup>J<sub>CP</sub> = 5 Hz), 160.5 (C<sup>7</sup>). <sup>31</sup>P{<sup>1</sup>H} NMR (121 MHz, CDCl<sub>3</sub>, 25 °C)  $\delta$  36.7. IR (cm<sup>-1</sup>):  $\nu(\text{NH})$  3480, 3348,  $\nu(\text{C}=\text{N})$ , 1603. Anal. Found: C, 61.73; H, 5.04; N, 4.96 Calcd for C<sub>28</sub>H<sub>27</sub>N<sub>2</sub>OPPd: C, 61.72; H, 4.99; N, 5.14.

**Synthesis of [Pd{C,N,N'-C<sub>6</sub>H<sub>4</sub>{C(NH<sub>2</sub>)=NOCH<sub>2</sub>(C<sub>5</sub>H<sub>4</sub>N-2)}-2}(PTol<sub>3</sub>)]ClO<sub>4</sub> (6).** To a mixture containing K<sup>t</sup>BuO (21.2 mg, 0.19 mmol) and [ClCH<sub>2</sub>pyH-2]Cl (15.5 mg, 0.09 mmol) in degassed CH<sub>2</sub>Cl<sub>2</sub> (10 mL) was added, under N<sub>2</sub> atmosphere, another solution containing complex **2a** (54 mg, 0.09 mmol) in the same solvent (5 mL) and the mixture was stirred for 1 h. The solvent was removed under vacuum and acetone (10 mL) and

NaClO<sub>4</sub>·H<sub>2</sub>O (25 mg, 0.18 mmol) were successively added to the residue in the open air. The reaction mixture was stirred for 1 additional hour, and the solvent removed again under vacuum. The residue was stirred with CH<sub>2</sub>Cl<sub>2</sub> (15 mL), the resulting suspension was filtered, the solution was concentrated to 1 mL and Et<sub>2</sub>O (10 mL) was added. The suspension was stirred in an ice/water bath for a few min, and filtered. The solid collected was washed with Et<sub>2</sub>O (2 mL) and dried, first by suction and then in an oven at 70 °C for 1 h to give **7** as a pale yellow solid (58 mg, 0.08 mmol, 88%). Crystals of **6** suitable for an X-ray diffraction study grew from CH<sub>2</sub>Cl<sub>2</sub> and Et<sub>2</sub>O by the liquid diffusion method. Mp: 295 °C (decomp). <sup>1</sup>H NMR (CDCl<sub>3</sub>, 400 MHz, 25 °C) δ 2.35 (s, 9 H, Me, Tol), 5.19 (s, 2 H, CH<sub>2</sub>), 6.45 (dd, 1 H, H<sup>6</sup>, <sup>3</sup>J<sub>HH</sub> = 8 Hz, <sup>4</sup>J<sub>HH</sub> = 5 Hz), 6.52 (s, br, 2 H, NH<sub>2</sub>), 6.62 (t, 1 H, H<sup>5</sup>, <sup>3</sup>J<sub>HH</sub> = 8 Hz), 6.87 (t, 1 H, H<sup>12</sup>, <sup>3</sup>J<sub>HH</sub> = 7 Hz), 7.04 (t, 1 H, H<sup>4</sup>, <sup>3</sup>J<sub>HH</sub> = 8 Hz), 7.16 (d, *meta*-H, Tol, <sup>3</sup>J<sub>HH</sub> = 7 Hz), 7.45 (d, 1 H, H<sup>3</sup>, <sup>3</sup>J<sub>HH</sub> = 8 Hz), 7.49 (dd, *ortho*-H, Tol, <sup>3</sup>J<sub>HP</sub> = 12 Hz, <sup>3</sup>J<sub>HH</sub> = 7 Hz), 7.52 (d, 1 H, H<sup>10</sup>, <sup>3</sup>J<sub>HH</sub> = 7 Hz), 7.68 (d, 1 H, H<sup>13</sup>, <sup>3</sup>J<sub>HH</sub> = 7 Hz), 7.78 (td, 1 H, H<sup>11</sup>, <sup>3</sup>J<sub>HH</sub> = 7 Hz, <sup>4</sup>J<sub>HH</sub> = 1 Hz). <sup>13</sup>C{<sup>1</sup>H} NMR (100 MHz, CDCl<sub>3</sub>, 25 °C) δ 21.4 (Me, Tol), 124.8 (C<sup>12</sup>), 125.1 (C<sup>3</sup>), 125.6 (C<sup>4</sup>), 125.9 (d, *ipso*-C, Tol, <sup>1</sup>J<sub>CP</sub> = 52 Hz), 126.7 (C<sup>10</sup>), 129.8 (d, *meta*-C, Tol, <sup>3</sup>J<sub>CP</sub> = 11 Hz), 129.9 (C<sup>5</sup>), 134.8 (d, *ortho*-C, Tol, <sup>2</sup>J<sub>CP</sub> = 13 Hz), 137.0 (d, C<sup>2</sup>, <sup>3</sup>J<sub>CP</sub> = 1 Hz), 137.9 (d, C<sup>6</sup>, <sup>3</sup>J<sub>CP</sub> = 12 Hz), 139.7 (C<sup>11</sup>), 142.3 (d, *para*-C, Tol, <sup>4</sup>J<sub>CP</sub> = 2 Hz), 148.7 (d, C<sup>1</sup>, <sup>2</sup>J<sub>CP</sub> = 3 Hz), 152.5 (d, C<sup>13</sup>, <sup>3</sup>J<sub>CP</sub> = 3 Hz), 153.2 (C<sup>9</sup>) 163.8 (C<sup>7</sup>). <sup>31</sup>P{<sup>1</sup>H} NMR (121 MHz, CDCl<sub>3</sub>, 25 °C) δ 39.9. IR (cm<sup>-1</sup>): ν(NH), 3486, 3368; ν(C=N), 1654; ν(ClO) 1080, δ (OCIO) 621. Anal. Found: C, 55.46; H, 4.48; N, 5.64 Calcd for C<sub>34</sub>H<sub>33</sub>ClN<sub>3</sub>O<sub>5</sub>PPd: C, 55.45; H, 4.52; N, 5.71.

**Synthesis of [Pd{C,N,-C(N=Xy)C<sub>6</sub>H<sub>4</sub>{C(NH<sub>2</sub>)=NOH}-2}Cl(CNXy)] (**7**).** To a solution of **2b** (85 mg, 0.21 mmol) in CH<sub>2</sub>Cl<sub>2</sub> (15 mL) was dropwise added another solution of XyNC (27.3 mg, 0.21 mmol) in the same solvent (5 mL). After three days of stirring the solution was concentrated under vacuum to 10 mL and Et<sub>2</sub>O (10 mL) was added. The suspension was filtered to remove a small amount of an yellow-orange solid the <sup>1</sup>H NMR of



which coincides with that of the Pd(I) complex  $[\text{PdCl}(\text{CNXy})_2]_2$ ,<sup>12</sup> the solution was concentrated (1 mL) and  $\text{Et}_2\text{O}$  (15 mL) was added. The suspension was filtered and the solid collected was washed with  $\text{Et}_2\text{O}$  (2 x 2 mL) and dried by suction to give **7** as a cream colored solid (25 mg, 0.04 mmol, 20%). When the mother liquor was further concentrated (5 mL) and  $\text{Et}_2\text{O}$  (15 mL) was added, a suspension formed which was filtered, dried (75 mg), and shown by  $^1\text{H}$  NMR to contain a 1.3:1 mixture of **2b** and **7** which we could not separate. Mp: 196-198 °C (decomp).  $^1\text{H}$  NMR (200 MHz,  $\text{CDCl}_3$ , 25°C):  $\delta$  2.12 (s, 6 H, Me,  $\text{Xy}^{\text{Pd}}$ ), 2.28 (s, 6 H, Me,  $\text{Xy}^{\text{im}}$ ), 5.65 (s, br, 2 H,  $\text{NH}_2$ ), 6.81-6.89 (m, 3 H, *meta*-CH,  $\text{Xy}^{\text{im}}$  + *para*-CH,  $\text{Xy}^{\text{im}}$ ), 7.02 (d, 2 H, *meta*-CH,  $\text{Xy}^{\text{Pd}}$ ,  $^3J_{\text{HH}} = 8$  Hz), 7.19 (dd, 1 H, Ar,  $^3J_{\text{HH}} = 8$  Hz,  $^3J_{\text{HH}} = 7$  Hz), 7.46-7.69 (m, 4 H, Ar + Xy), 9.54 (s, 1 H, OH).  $^{13}\text{C}\{^1\text{H}\}$  NMR (75 MHz,  $\text{CDCl}_3$ , 25 °C)  $\delta$  18.6 (Me) 19.1(Me), 123.6 (*para*-CH,  $\text{Xy}^{\text{im}}$ ), 125.5, ( $\text{CH}^6$ ), 126.5 ( $\text{CH}^3$ ), 127.1 (*ortho*-C,  $\text{Xy}^{\text{im}}$ ), 127.3 (*ipso*-C,  $\text{Xy}^{\text{Pd}}$ ), 127.7 (*meta*-CH,  $\text{Xy}^{\text{Pd}}$ ), 127.9 (*meta*-CH,  $\text{Xy}^{\text{im}}$ ), 129.1 ( $\text{CH}^4$ ), 129.6 (*para*-CH,  $\text{Xy}^{\text{Pd}}$ ), 132.2 ( $\text{CH}^5$ ), 135.2 (*ortho*-C,  $\text{Xy}^{\text{Pd}}$ ), 135.6 ( $\text{C}^1$ ), 137.4 ( $\text{C}^2$ ), 149.7 (*ipso*-C,  $\text{Xy}^{\text{im}}$ ), 150.9 ( $\text{C}^7$ ), 175.6 ( $\text{C}=\text{NXy}$ ). IR ( $\text{cm}^{-1}$ ):  $\nu(\text{NH}) + (\text{OH})$ , 3456, 3273, 3242;  $\nu(\text{C}\equiv\text{N})$  2190, 2158 (sh);  $\nu(\text{C}=\text{N})$ ,  $\nu(\text{C}=\text{N})$ , 1661, 1615. Anal. Found: C, 55.57; H, 4.81; N, 9.91. Calcd for  $\text{C}_{25}\text{H}_{25}\text{ClN}_4\text{OPd}$ : C, 55.67; H, 4.67; N, 10.39. Crystals of **7** suitable for an X-ray diffraction study grew by the liquid diffusion method, from a mixture **2b**:**7** dissolved in  $\text{CH}_2\text{Cl}_2$  and layered with n-pentane.

**Synthesis of  $[\{\text{Pd}(\text{tbbpy})\}_2\{\text{C},\text{N},\text{N}',\text{O}-\text{C}_6\text{H}_4\{\text{C}(\text{NH})=\text{NO}\}-2\}]\text{ClO}_4$  (tbbpy = 4,4'-di-tert-butylbipyridine (8)).** To a solution of **3b** (50 mg, 0.08 mmol) in acetone (5mL) were successively added tbbpy (22 mg, 0.08 mmol) and  $\text{Pd}(\text{OAc})_2$  (18 mg, 0.08 mmol). The solution turned redish within a few minutes and, after being stirred overnight, it was of purple-red color. It was filtered through a short pad of Celite, concentrated under vacuum to 1 mL and  $\text{Et}_2\text{O}$  (15 mL) was added. The suspension was filtered and the deep purple solid collected was washed with  $\text{Et}_2\text{O}$  (2 x 5 mL) and dried, first by suction and then in an oven at

80 °C overnight. Yield: 77 mg, 0.078 mmol, 96%, Mp: 257 °C.  $^1\text{H}$  NMR (300 MHz,  $d_6$ -acetone, 25°C):  $\delta$  1.36 (s, 9 H, Me,  $^t\text{Bu}$ ), 1.43 (s, 9 H, Me,  $^t\text{Bu}$ ), 1.45 (s, 9 H, Me,  $^t\text{Bu}$ ), 1.49 (s, 9 H, Me,  $^t\text{Bu}$ ), 2.80 (s, 1 H), 2.84 ( $\text{H}_2\text{O}$ ), 6.96 (m, 2 H), 7.25 (m, 2 H), 7.55 (a, br, 1 H), 7.82 (d, 1 H,  $^3J_{\text{HH}} = 5$  Hz), 7.89 (s, 1 H), 7.97 (s, 1 H), 8.49 (s, 2 H, tbbpy), 8.59 (s, 2 H, tbbpy), 8.80 (s, vbr, 1 H), 8.90 (s, br, 1 H), 8.99 (d, 1 H,  $^3J_{\text{HH}} = 5$  Hz), 10.09 (s, vbr, 1 H).  $^{13}\text{C}\{^1\text{H}\}$  NMR (75 MHz,  $d_6$ -acetone, 25 °C)  $\delta$  30.4 (Me,  $^t\text{Bu}$ ), 30.5 (Me,  $^t\text{Bu}$ , double intensity), 30.6 (Me,  $^t\text{Bu}$ ), 36.3 ( $\text{CMe}_3$ , double intensity), 36.4 ( $\text{CMe}_3$ ), 36.5 ( $\text{CMe}_3$ ), 120.3 (CH), 120.9 (CH), 121.2 (CH), 121.4 (CH), 122.2 (CH), 122.3 (CH), 124.3 (CH), 124.7 (CH), 124.8 (CH), 125.1 (CH), 125.2 (CH), 127.0 (CH), 130.9 (CH), 136.9 (CH), 149.3 (CH), 149.4 (CH), 149.64 (C), 149.67 (C), 149.70 (C), 152.0 (CH), 152.1 (CH), 152.4 (CH), 154.9 (C, tbbpy), 155.3 (C, tbbpy), 156.2 (C, tbbpy), 157.2 (C, tbbpy), 164.8 (C, tbbpy), 165.01 (C, tbbpy), 165.06 (C, tbbpy), 165.13 (C, tbbpy). IR ( $\text{cm}^{-1}$ ):  $\nu(\text{NH})$ , 3379;  $\nu(\text{C}=\text{N})$  1616,  $\nu(\text{ClO})$  1095,  $\delta$  ( $\text{OCIO}$ ) 623. Anal. Found: C, 52.37; H, 5.47; N, 8.48. Calcd for  $\text{C}_{43}\text{H}_{53}\text{ClN}_6\text{O}_5\text{Pd}_2$ : C, 52.58; H, 5.44; N, 8.56.  $\Lambda_{\text{M}}$  ( $\Omega^{-1}\cdot\text{cm}^2\cdot\text{mol}^{-1}$ ): 107 ( $3.06 \times 10^{-4}$  M in acetone). Crystals of **8**·solvents grew by the liquid diffusion method using  $\text{CH}_2\text{Cl}_2$  and  $\text{Et}_2\text{O}$ .

**X-ray Crystallography.** Compounds **2a**, **6** and **7** were measured on a Bruker Smart APEX machine and compound **8** on a Bruker D8Quest machine. Data were collected using monochromated Mo-K $\alpha$  radiation in  $\omega$  scan for compounds **2a**, **6** and **7** and monochromated Cu-K $\alpha$  radiation in  $\omega$  and  $\phi$  scan for **8**. The structures were solved by direct methods. All were refined anisotropically on  $F^2$ . The methyl hydrogens were refined using a rigid groups and the other hydrogens were refined using a riding mode. The  $\text{NH}_2$  and OH hydrogens were refined as free and with DFIX in compound **7** and **8** and SADI in compounds **2a** and **6**.

Special features: Compound **8** has one *tert*-butyl group disordered over two positions, ca 71:29% and a poorly-resolved region of residual electron density that could not be adequately modelled and so was "removed" using the program SQUEEZE, which is part of the PLATON

system. The void volume per cell was  $1761.9 \text{ \AA}^3$ , with a void electron count per cell of 421. This additional solvent was not taken into account when calculating derived parameters such as the formula weight, because the nature of the solvent was uncertain.

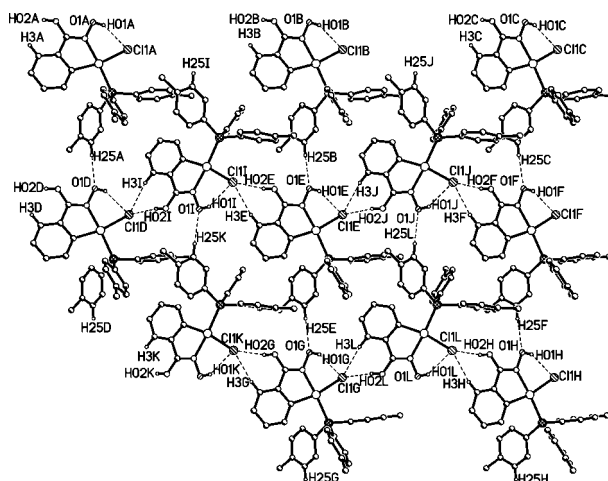

**Figure 1.** Layers parallel to the *ab* plane in **2a** formed through O-H...Cl, N-H...Cl, C-H...Cl and C-H...O hydrogen bonds.

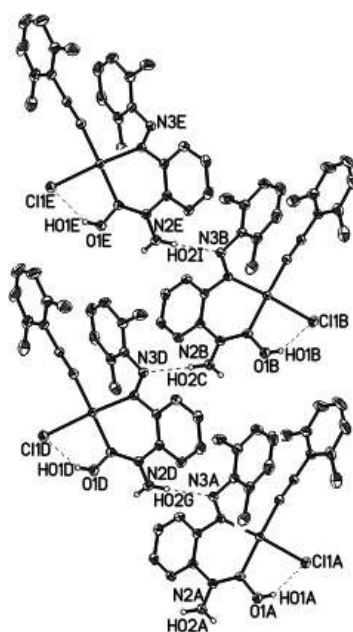

**Figure 2.** Chains along the *b* axis in **7** formed through N-H...N hydrogen bonds



Table 1. Crystal data and structure refinement of complexes **2a**, **6**, **7** and **8**.

| Complex                                          | <b>2a</b>                                            | <b>6</b>                                                            | <b>7</b>                                             | <b>8</b>                                                                        |
|--------------------------------------------------|------------------------------------------------------|---------------------------------------------------------------------|------------------------------------------------------|---------------------------------------------------------------------------------|
| Formula                                          | C <sub>28</sub> H <sub>28</sub> ClN <sub>2</sub> OPd | C <sub>44</sub> H <sub>33</sub> ClN <sub>3</sub> O <sub>5</sub> PPd | C <sub>25</sub> H <sub>25</sub> ClN <sub>4</sub> OPd | C <sub>43</sub> H <sub>53</sub> ClN <sub>6</sub> O <sub>5</sub> Pd <sub>2</sub> |
| Fw                                               | 581.34                                               | 736.45                                                              | 539.34                                               | 982.16                                                                          |
| Temperature (K)                                  | 100(2) K                                             | 100(2)                                                              | 100(2)                                               | 100(2)                                                                          |
| Crystal system                                   | Monoclinic                                           | Triclinic                                                           | Monoclinic                                           | Monoclinic                                                                      |
| Space group                                      | P 2(1)/n                                             | P -1                                                                | P 2(1)/c                                             | C 2/c                                                                           |
| <i>a</i> (Å)                                     | 11.8915(8)                                           | 9.4517(9)                                                           | 14.058(7)                                            | 25.9442(11)                                                                     |
| <i>b</i> (Å)                                     | 15.4151(11)                                          | 11.4744(11)                                                         | 11.058(5)                                            | 21.3161(9)                                                                      |
| <i>c</i> (Å)                                     | 14.5332(11)                                          | 14.6828(14)                                                         | 14.952(7)                                            | 20.3264(8)                                                                      |
| $\alpha$ (deg)                                   | 90                                                   | 101.775(2)                                                          | 90                                                   | 90                                                                              |
| $\beta$ (deg)                                    | 93.245(2)                                            | 93.311(2)                                                           | 94.647(8)                                            | 121.104(2)                                                                      |
| $\gamma$ (deg)                                   | 90                                                   | 94.011(2)                                                           | 90                                                   | 90                                                                              |
| Volume (Å <sup>3</sup> )                         | 2659.8(3)                                            | 1550.8(3)                                                           | 2316.7(19)                                           | 9625.0(7)                                                                       |
| <i>Z</i>                                         | 4                                                    | 2                                                                   | 4                                                    | 8                                                                               |
| $\rho_{\text{calcd}}$ (Mg m <sup>-3</sup> )      | 1.452                                                | 1.577                                                               | 1.546                                                | 1.356                                                                           |
| $\mu$ (mm <sup>-1</sup> )                        | 0.881                                                | 0.784                                                               | 0.941                                                | 6.907                                                                           |
| <i>F</i> (000)                                   | 1184                                                 | 752                                                                 | 1096                                                 | 4016                                                                            |
| crystal size (mm)                                | 0.19x0.18x0.14                                       | 0.20x0.08x0.05                                                      | 0.22 x 0.12 x 0.10                                   | 0.27 x 0.17 x 0.15                                                              |
| $\theta$ range (deg)                             | 1.93 to 28.72                                        | 1.82 to 28.73                                                       | 2.29 to 28.70                                        | 2.87 to 66.87                                                                   |
| no. rflns coll                                   | 32031                                                | 19050                                                               | 27358                                                | 84208                                                                           |
| no. indep rflns / <i>R</i> <sub>int</sub>        | 6463 / 0.0251                                        | 7303 / 0.0260                                                       | 5603 / 0.0319                                        | 8527 / 0.0441                                                                   |
| Transmission                                     | 0.8866 / 0.8137                                      | 0.9618 / 0.7404                                                     | 0.9117 / 0.6295                                      | 0.2058 / 0.0733                                                                 |
| restraints/parameters                            | 1 / 322                                              | 1 / 417                                                             | 3 / 305                                              | 505 / 525                                                                       |
| Goodness of fit on <i>F</i> <sup>2</sup>         | 1.066                                                | 1.039                                                               | 1.047                                                | 1.179                                                                           |
| <i>R</i> 1 ( <i>I</i> > 2 $\sigma$ ( <i>I</i> )) | 0.0240                                               | 0.0274                                                              | 0.0304                                               | 0.0703                                                                          |
| <i>wR</i> 2 (all reflns)                         | 0.0636                                               | 0.0688                                                              | 0.0776                                               | 0.1837                                                                          |
| Larg. diff. peak/hole (e.Å <sup>-3</sup> )       | 0.493 / -0.253                                       | 0.520 / -0.473                                                      | 0.992 / -0.748                                       | 2.882 / -0.552                                                                  |
